# Supplementary material for: Arthritis induced by posttranslationally modified (citrullinated) fibrinogen in DR4-IE transgenic mice
Source: PubMed Central journal article supplement — J Exp Med. 2008 Apr 14;205(4):967–79. doi: 10.1084/jem.20072051 (PMC2292232; doi:10.1084/jem.20072051), 2008-04-14
Supplement: jexpmed_jem.20072051_7.pdf [file jexpmed_jem.20072051_7.pdf]

| Table S1 Raw data and peptide sequences for results shown in Figure 6C |                                       |               |               |               |               |               |              |              |              |              |              |  |
|------------------------------------------------------------------------|---------------------------------------|---------------|---------------|---------------|---------------|---------------|--------------|--------------|--------------|--------------|--------------|--|
| Antigen                                                                | Amino Acid Sequence                   | DR4 CithFib-1 | DR4 CithFib-2 | DR4 CithFib-3 | DR4 CithFib-4 | DR4 CithFib-5 | B6 CithFib-1 | B6 CithFib-2 | B6 CithFib-3 | B6 CithFib-4 | B6 CithFib-5 |  |
| A2591 hFibB211-230cit                                                  | KLESDVSAQMEY[CIT]TPCTVS               | 311           | 217.5         | 2131.5        | 2287.5        | 157           | -22          | 6.5          | 4            | 86           | 69           |  |
| A2583 hFibB46-65cit                                                    | H[CIT]PLDKK[CIT]JEEAPSL[CIT]PAPP      | 736.5         | 549.5         | 3294          | 2588          | 3085.5        | 22620        | 8322         | 876.5        | 2119         | 45967.5      |  |
| A2579 hFibB451-470                                                     | QYTWDMAKHGTDGCVVWNNW                  | 154.5         | 440           | 3309          | 4388          | 2104.5        | 7            | 66.5         | 31.5         | 819          | 1868.5       |  |
| A2577 hFibB421-440                                                     | RKQCSKEDGGGWYVNRCHAA                  | 4697          | 3915          | 3526          | 1815.5        | 5405          | 3362         | 275          | 348          | 2168.5       | 1903         |  |
| A2572 hFibB346-365                                                     | DWKGDKVKAHYGGFTVQNEA                  | -0.5          | 1             | 132.5         | 80.5          | -3.5          | 374          | 36.5         | 122          | 222          | 360.5        |  |
| A2563 hFibB211-230                                                     | KLESDVSAQMEYCRTPCTVS                  | 18            | 80.5          | 918.5         | 387           | 1859          | -55          | 21.5         | 3            | 104.5        | -29.5        |  |
| A2558 hFibB136-155                                                     | AVSQTSSSSFQYMYLLKDLW                  | 530.5         | 1640          | 10899         | 13046.5       | 6789          | 812.5        | 212          | 176.5        | 888          | -147.5       |  |
| A2556 hFibB106-125                                                     | CPTGCQLQEALLQQRPIRN                   | 50.5          | 158.5         | 717.5         | 1187          | 355.5         | 88.5         | 7            | 22           | 297.5        | -35.5        |  |
| A2555 hFibB91-110                                                      | DAGGCLHADPDLGLVCLPTGC                 | 1136          | 2496          | 3506.5        | 2586          | 325           | 64819.5      | 36411        | 1928.5       | 5991.5       | 11568        |  |
| A2549 hFibB1-20                                                        | MKRMVSWSFHKLKTKMKHLL                  | 19.5          | -18           | 50            | 56            | 5             | 82           | 64           | 72.5         | 327          | -97          |  |
| A2548 hFibA616-635cit                                                  | THSTK[CIT]GHAKS[CIT]JPV[CIT]GIHTS     | 25            | 76            | 335           | 251.5         | 130           | 588          | 25           | 42           | 89           | -82.5        |  |
| A2544 hFibA541-560cit                                                  | VSETES[CIT]GSESGIFTNTKES              | 412           | 329.5         | 156           | 25.5          | 153           | 6027         | 4675.5       | 947          | 31168        | 8462.5       |  |
| A2537 hFibA406-425cit                                                  | NNPDWGTFEEVSGNVSPGT[CIT]              | 294.5         | 1916          | 41.5          | 46.5          | -14           | 12635.5      | 19027        | 65.5         | 47526        | 13015.5      |  |
| A2536 hFibA391-410cit                                                  | GSF[CIT]PDSPPSGGNA[CIT]PNNDPW         | 1795          | 1888.5        | 855.5         | 846           | 22            | 216          | 15           | 820          | 256.5        | 64           |  |
| A2527 hFibA211-230cit                                                  | DLLPS[CIT]D[CIT]QHLPLIKMKPVP          | 160.5         | 154.5         | 574           | 202.5         | 10.5          | 1312.5       | 114          | 332          | 5097         | 4729.5       |  |
| A2522 hFibA121-140cit                                                  | NN[CIT]DNTY[N[CIT]VSEDL[CIT]S[CIT]IEV | 190.5         | 2185          | 4848          | 8539          | 909           | 486          | 2601         | 434.5        | 193.5        | -39          |  |
| A2514 hFibA616-635                                                     | THSTKRGHAKSRPVRGIHTS                  | 20            | 26.5          | 43.5          | -2            | 154.5         | 352.5        | 4.5          | 185.5        | 182.5        | -71.5        |  |
| A2509 hFibA541-560                                                     | VSETESRGSESGIFTNTKES                  | 913.5         | 430           | 395.5         | 244           | 744           | 19142.5      | 7281         | 1337.5       | 19032.5      | 5222.5       |  |
| A2500 hFibA406-425                                                     | NNPDWGTFEEVSGNVSPGTR                  | 4485.5        | 7634.5        | 138.5         | 21            | 1.5           | 34398        | 34434        | 3            | 41089        | 11574        |  |
| A2490 hFibA256-275                                                     | QMRMELERPGGNEITRGGST                  | 32            | 39.5          | 28.5          | 15            | 124.5         | 162.5        | 22           | 74           | 290          | -3.5         |  |
| A2476 hFibA46-65                                                       | ACKDSDWPFCSDEDWDWPF                   | 22412.5       | 27109.5       | 35470         | 36047         | 14428.5       | 9955         | 2344.5       | 5510         | 9549.5       | 10603.5      |  |

| Antigen               | Amino Acid Sequence                   | B6 hFib-1 | B6 hFib-2 | B6 hFib-3 | B6 hFib-4 | B6 hFib-5 | DR4 hFib-1 | DR4 hFib-2 | DR4 hFib-3 | DR4 hFib-4 | DR4 hFib-5 |
|-----------------------|---------------------------------------|-----------|-----------|-----------|-----------|-----------|------------|------------|------------|------------|------------|
| A2591 hFibB211-230cit | KLESDVSAQMEY[CIT]TPCTVS               | 123       | 6.5       | 11.5      | 25        | -59       | 428        | 8.5        | 6.5        | 60.5       | 23         |
| A2583 hFibB46-65cit   | H[CIT]PLDKK[CIT]JEEAPSL[CIT]PAPP      | 856.5     | 841.5     | 1176.5    | 1568      | 790       | 369.5      | 1367       | 1527.5     | 624.5      | 1277.5     |
| A2579 hFibB451-470    | QYTWDMAKHGTDGCVVWNNW                  | 111.5     | 67.5      | 123       | 145.5     | 442       | 946.5      | 27.5       | 1281       | 200.5      | 760        |
| A2577 hFibB421-440    | RKQCSKEDGGGWYVNRCHAA                  | 2388.5    | 485.5     | 1315      | 326.5     | 1132      | 3758.5     | 1871.5     | 3742       | 59.5       | 1776.5     |
| A2572 hFibB346-365    | DWKGDKVKAHYGGFTVQNEA                  | 281.5     | 445       | 154       | 66        | 337.5     | 8.5        | 7.5        | 142.5      | 0          | 16         |
| A2563 hFibB211-230    | KLESDVSAQMEYCRTPCTVS                  | 77        | 11.5      | -18       | 3.5       | -94.5     | 42         | 18         | 87         | 60         | -9.5       |
| A2558 hFibB136-155    | AVSQTSSSSFQYMYLLKDLW                  | 288.5     | 274.5     | 309.5     | 294.5     | 1469      | 5503       | 775        | 1834.5     | 1062.5     | 1498       |
| A2556 hFibB106-125    | CPTGCQLQEALLQQRPIRN                   | 90.5      | -4        | 39.5      | 13        | -49.5     | 69.5       | 48.5       | 5.5        | 6          | 90.5       |
| A2555 hFibB91-110     | DAGGCLHADPDLGLVCLPTGC                 | 442.5     | 154       | 690.5     | 356.5     | 119       | 921.5      | 765        | 2606       | 248.5      | 171.5      |
| A2549 hFibB1-20       | MKRMVSWSFHKLKTKMKHLL                  | 160       | 288.5     | 544       | 467       | 273       | 59         | 100        | -202       | 133.5      | 51         |
| A2548 hFibA616-635cit | THSTK[CIT]GHAKS[CIT]JPV[CIT]GIHTS     | 973       | 617.5     | 836.5     | 155.5     | 236       | 21         | 74         | -64        | 34.5       | 22.5       |
| A2544 hFibA541-560cit | VSETES[CIT]GSESGIFTNTKES              | 5051      | 875.5     | 2119      | 152       | 1112      | 23         | 315.5      | 300        | 127        | 231.5      |
| A2537 hFibA406-425cit | NNPDWGTFEEVSGNVSPGT[CIT]              | 15410     | 3808.5    | 1587.5    | 42.5      | 630       | 322        | 9166       | 305        | 1991.5     | 335        |
| A2536 hFibA391-410cit | GSF[CIT]PDSPPSGGNA[CIT]PNNDPW         | 39.5      | -11       | 4.5       | -1.5      | 24        | 532        | 18.5       | 1032       | 14.5       | 7.5        |
| A2527 hFibA211-230cit | DLLPS[CIT]D[CIT]QHLPLIKMKPVP          | 852.5     | 1924      | 227.5     | -2.5      | -13.5     | 26.5       | 9.5        | 62         | -1.5       | -9         |
| A2522 hFibA121-140cit | NN[CIT]DNTY[N[CIT]VSEDL[CIT]S[CIT]IEV | 156.5     | 25.5      | 25        | 21.5      | -134      | 5.5        | 26.5       | 387.5      | -3         | -43        |
| A2514 hFibA616-635    | THSTKRGHAKSRPVRGIHTS                  | 341       | 164.5     | 124.5     | 331.5     | 493       | 36         | 73.5       | 66         | 26         | 50.5       |
| A2509 hFibA541-560    | VSETESRGSESGIFTNTKES                  | 8053      | 3534      | 12075     | 2716      | 18780.5   | 796        | -2403      | 1826       | 1946       | 7849       |
| A2500 hFibA406-425    | NNPDWGTFEEVSGNVSPGTR                  | 17103     | 7508.5    | 4308      | 8         | 1614      | 789        | 16323.5    | 220        | 9727       | 1430       |
| A2490 hFibA256-275    | QMRMELERPGGNEITRGGST                  | 177.5     | 70.5      | 6.5       | 26        | -59       | 29190.5    | 17.5       | 1231       | 3          | 26326      |
| A2476 hFibA46-65      | ACKDSDWPFCSDEDWDWPF                   | 14573     | 7323.5    | 13009.5   | 12128     | 8963      | 10735.5    | 24532      | 25156.5    | 2157.5     | 13076.5    |

Values represent normalized arbitrary antibody units

Table S2

Raw data and peptide sequences for results shown in Figure 6E

| Antigen                              | Amino Acid Sequence           | DR4 CithFib-1 | DR4 CithFib-2 | DR4 CithFib-3 | DR4 CithFib-4 | DR4 CithFib-5 | B6 CithFib-1 | B6 CithFib-2 | B6 CithFib-3 | B6 CithFib-4 | B6 CithFib-5 | t-test |
|--------------------------------------|-------------------------------|---------------|---------------|---------------|---------------|---------------|--------------|--------------|--------------|--------------|--------------|--------|
| A711 fibrin                          | Protein                       | 0             | -3            | -9            | 6             | -29           | 3.5          | 2.5          | 30.5         | 14.5         | 64           | 0.0486 |
| A551 hnRNP-A2 (17-38)                | SFETTEESLRNYYEQWGKLTDC        | 62.5          | 187.5         | 511.5         | 245           | 106           | 51.5         | 17           | 31           | 90.5         | -74.5        | 0.0439 |
| A2500 hFibA406-425                   | NNPDWGTFEEVSGNVSPGTR          | 4485.5        | 7634.5        | 138.5         | 21            | 1.5           | 34398        | 34434        | 3            | 41089        | 11574        | 0.0261 |
| A2462 vim286-305cit                  | EAEWYKSKFADLSEAAN[CIT]N       | 247           | 978.5         | 1966.5        | 1323          | 1330          | 75.5         | 20           | -19          | 274          | 111.5        | 0.0054 |
| A2460 vim256-275cit                  | IDVDVSKPDLTAAL[CIT]DV[CIT]QQ  | 37.5          | 2643.5        | 2313          | 3678          | -177          | -58          | -7.5         | -38          | -105.5       | -66.5        | 0.0492 |
| A2433 vim286-305                     | EAEWYKSKFADLSEAANRN           | 107.5         | 140           | 465           | 395           | 385.5         | 52.5         | 14.5         | 8            | 241          | -105.5       | 0.0237 |
| A2396 H2B/r 16-36                    | KKAVTKAQKKDGKSAHRKE           | 195.5         | 348.5         | 598           | 339.5         | 534.5         | 42           | 44           | 40           | 52           | -32          | 0.001  |
| A2371 H2A 79-98                      | IIPRHLQLAIRNDEELNKL           | 1041.5        | 689.5         | 7690.5        | 10433         | 5050.5        | 943.5        | 72.5         | 175          | 802          | 378          | 0.0444 |
| A2353 Serine Protease 11 391-410 cit | TSSKAKELKD[Cit]H[Cit]DFPDVIS  | 5             | 178           | 123           | 206.5         | 246.5         | -94          | 19.5         | 9            | 62           | -25.5        | 0.0127 |
| A2348 Vitronectin 223-242 cit        | KGNQYW[Cit]FEDGVLDPDYP[Cit]N  | 24.5          | 35.5          | 52.5          | 131.5         | 223           | -53.5        | 4            | 16           | 12.5         | -66.5        | 0.0278 |
| A2346 Vitronectin 196-215 cit        | I[Cit]DVWGIIEGPIDAAFT[Cit]INC | 35.5          | 69.5          | 633           | 399           | 719.5         | 5            | 31           | 11.5         | 76.5         | -21.5        | 0.038  |
| A2338 Clusterin 416-435 cit          | EQFNWVS[Cit]LANLTQGEDQYY      | 396.5         | 231.5         | 1352.5        | 512           | 613.5         | 145          | 26           | 211          | 201.5        | 209          | 0.0465 |
| A2321 Fibromodulin 345-364 cit       | LQVV[Cit]LDGNEIK[Cit]SAMPADA  | 14.5          | 228.5         | 260           | 414           | 63.5          | -64.5        | 9            | 4            | 124          | -8.5         | 0.0469 |
| A2317 Fibromodulin 261-280 cit       | DSYF[Cit]GAPKLLYV[Cit]LSHNSL  | 47.5          | 1.5           | 426.5         | 463.5         | 510.5         | 35.5         | 51           | 8            | 112.5        | -51.5        | 0.05   |
| A2316 Fibromodulin 246-265 cit       | LEQLYMEHNNVYTVPSYF[Cit]       | 117           | 130           | 770.5         | 1072.5        | 1912.5        | -218         | 20.5         | 12           | 98.5         | -15          | 0.0412 |
| A2305 Biglycan 238-257 cit           | HNKIQAIELEDLL[Cit]YSKLY[Cit]  | 143.5         | 251.5         | 1089          | 1541.5        | 2259.5        | 207          | 71           | -22.5        | 228          | -26          | 0.0428 |
| A2301 COMP 468-487 cit               | CDDDDNDGVPDS[Cit]DNC[Cit]LV   | 340           | 4137          | 3573.5        | 3649.5        | 1717          | 1226         | 25           | 259          | 84           | 228.5        | 0.0147 |
| A2293 Serine Protease 11 433-452     | VIISINGQSVVSANDVSDVI          | 4             | 32.5          | 295.5         | 324           | 192.5         | 1.5          | 14           | 6.5          | 24           | -64.5        | 0.0333 |
| A2285 Vitronectin 223-242            | KGNQYWRFEEDGVLDPDYPRN         | 17.5          | 50.5          | 112.5         | 74            | 279.5         | -107.5       | 13.5         | 15.5         | -4           | -43          | 0.0332 |
| A2278 Clusterin 472-491              | PVEVSRKNPKFMETVAEKAL          | 23            | 544.5         | 1148          | 736.5         | 404.5         | -6.5         | 13.5         | 29           | 55.5         | 235.5        | 0.0291 |
| A2232 COMP 498-517                   | DGVGDVCQDDFDADKVVDKI          | 36.5          | 37.5          | 184.5         | 135.5         | 31            | -86.5        | 6.5          | 18.5         | 4.5          | -12.5        | 0.0275 |
| A2214 HSP90                          | Protein                       | 49            | 244           | 891           | 547.5         | 294.5         | 82           | 43           | 156          | 21           | -20          | 0.0464 |
| A2003 cfc2                           | SHQESTRG[CIT]SRGRSGRSGS       | 309.5         | 220           | 374.5         | 79.5          | 196           | 106          | 37.5         | 32.5         | 139.5        | -27          | 0.0157 |

Values represent normalized arbitrary antibody units

**Table S3**

Raw data and peptide sequences for results shown in Figure 6D

| Antigen             | Amino Acid Sequence              | DR4 CithFib-1 | DR4 CithFib-2 | DR4 CithFib-3 | DR4 CithFib-4 | DR4 CithFib-5 | B6 CithFib-1 | B6 CithFib-2 | B6 CithFib-3 | B6 CithFib-4 | B6 CithFib-5 |
|---------------------|----------------------------------|---------------|---------------|---------------|---------------|---------------|--------------|--------------|--------------|--------------|--------------|
| A2471 vim421-440cit | LNL[CIT]ETNLDSLPLVDTHSK[CIT]     | 17396         | 65029.5       | 64943         | 65069         | 14256.5       | 56103.5      | 31           | 4657.5       | 1672         | 105.5        |
| A2466 vim346-365cit | EMEENFAVEAANYQDTIG[CIT]L         | 300.5         | 4477          | 1763.5        | 5456          | 470.5         | 220          | 92           | 62           | 306          | 206.5        |
| A2463 vim301-320cit | AAN[CIT]NNDAL[CIT]QAKQESTEY[CIT] | 64.5          | 177.5         | 196.5         | 912.5         | 974.5         | 12           | 6.5          | 40.5         | 46           | -36          |
| A2462 vim286-305cit | EAEWYKSKFADLSEAAN[CIT]N          | 247           | 978.5         | 1966.5        | 1323          | 1330          | 75.5         | 20           | -19          | 274          | 111.5        |
| A2460 vim256-275cit | IDVDVSKPDLTAAL[CIT]DV[CIT]QQ     | 37.5          | 2643.5        | 2313          | 3678          | -177          | -58          | -7.5         | -38          | -105.5       | -66.5        |
| A2454 vim136-155cit | EQLKGQGKS[CIT]LGDLYEEEM[CIT]     | 3413.5        | 1547          | 15016.5       | 17852.5       | 8289          | 5581         | 757.5        | 4158         | 5850.5       | 1682.5       |
| A2452 vim106-125cit | ELQELND[CIT]FANYIDKV[CIT]FLE     | 2600.5        | 7086.5        | 6146          | 11309         | 5555.5        | 3377.5       | 1118.5       | 1393         | 3007         | 1987         |
| A2448 vim46-65cit   | PSTS[CIT]SLYASSPGGVYAT[CIT]S     | 2344          | 1269          | 214.5         | 1507.5        | 297.5         | 670.5        | 469.5        | 1018         | 1459         | 287          |
| A2438 vim361-380    | TIGRLQDEIQNMKEEMARHL             | 68            | 304           | 4045.5        | 2068          | 2626.5        | 1546.5       | 40           | 183.5        | 224          | 318          |
| A2432 vim271-290    | DVRQQYESVAAKNLQEAEEW             | 4540.5        | 4876          | 26704         | 24794.5       | 14245         | 6030         | 613          | 1151.5       | 2539         | 3669         |

| Antigen             | Amino Acid Sequence              | B6 hFib-1 | B6 hFib-2 | B6 hFib-3 | B6 hFib-4 | B6 hFib-5 | DR4 hFib-1 | DR4 hFib-2 | DR4 hFib-3 | DR4 hFib-4 | DR4 hFib-5 |
|---------------------|----------------------------------|-----------|-----------|-----------|-----------|-----------|------------|------------|------------|------------|------------|
| A2471 vim421-440cit | LNL[CIT]ETNLDSLPLVDTHSK[CIT]     | 260.5     | -5.5      | 61        | -3.5      | 376       | 295        | 4.5        | -18        | 3.5        | -48        |
| A2466 vim346-365cit | EMEENFAVEAANYQDTIG[CIT]L         | 477.5     | 432       | 437       | 306       | 17.5      | 569.5      | 832        | 5251       | 143.5      | 1360.5     |
| A2463 vim301-320cit | AAN[CIT]NNDAL[CIT]QAKQESTEY[CIT] | 68.5      | 125.5     | 36.5      | 19.5      | 10        | 36         | 58         | 14.5       | 40.5       | 51         |
| A2462 vim286-305cit | EAEWYKSKFADLSEAAN[CIT]N          | 99        | 74.5      | 962       | 41.5      | 33        | 808        | 120.5      | 313        | 63.5       | 225.5      |
| A2460 vim256-275cit | IDVDVSKPDLTAAL[CIT]DV[CIT]QQ     | -46       | 28        | 96        | -336.5    | -137      | 348.5      | 49         | 1136       | -71.5      | -30.5      |
| A2454 vim136-155cit | EQLKGQGKS[CIT]LGDLYEEEM[CIT]     | 3301.5    | 932       | 763.5     | 364.5     | 1526      | 4431       | 2831.5     | 6628.5     | 807        | 2357.5     |
| A2452 vim106-125cit | ELQELND[CIT]FANYIDKV[CIT]FLE     | 5302.5    | 4741      | 4771      | 6175      | 4827.5    | 1556.5     | 3014.5     | 9407.5     | 549        | 1124       |
| A2448 vim46-65cit   | PSTS[CIT]SLYASSPGGVYAT[CIT]S     | 2560.5    | 3214.5    | 2481.5    | 3480.5    | 839.5     | 203.5      | 3149.5     | 1602       | 119.5      | 172        |
| A2438 vim361-380    | TIGRLQDEIQNMKEEMARHL             | 186       | 10.5      | 352.5     | 11.5      | -110      | 48.5       | 83.5       | 1104.5     | 38         | 253        |
| A2432 vim271-290    | DVRQQYESVAAKNLQEAEEW             | 1204.5    | 946       | 1382.5    | 1718      | 1377.5    | 6336       | 2964       | 11644      | 1727       | 7800       |

Values represent normalized arbitrary antibody units

**Table S4.** Arginine substitutions between sequences of human and mouse fibrinogen, their state of citrullination determined by mass spectrometry, and IgG antibody responses in DR4-IE tg and B6 mice immunized with CithFib.

| Position of non-conserved arginines | Citrullinated in vitro | DR4 CithFib | B6 CithFib |
|-------------------------------------|------------------------|-------------|------------|
| aR123F                              | Yes                    | 3147.7      | 623.8      |
| aR129Q                              | Yes                    | 3147.7      | 623.8      |
| aR181K                              | No                     | -           | -          |
| aR216K                              | No                     | -           | -          |
| aR271-                              | Yes                    | 32.8        | 20.6       |
| aR287-                              | Yes                    | 0           | 0          |
| aR308-                              | No                     | -           | -          |
| aR353-                              | No                     | -           | -          |
| aR367S                              | Yes                    | 0           | 0          |
| aR427K                              | Yes                    | 56.2        | 608.5      |
| aR444L                              | Yes                    | 0           | 288        |
| aR459H                              | Yes                    | 0           | 0          |
| aR510S                              | Yes                    | 49          | 0          |
| aR547-                              | Yes                    | 0           | 0          |
| aR573S                              | Yes                    | 270.2       | 48.9       |
| aR591-                              | Yes                    | 40.8        | 0          |
| bR33K                               | Yes                    | 7902.5      | 5221.5     |
| bR124K                              | Yes                    | 0           | 62.4       |
| bR158K                              | No                     | -           | -          |
| bR376K                              | No                     | -           | -          |

Human and mouse fibrinogen sequences were aligned by BLAST and regions where arginine residues in the human sequence were substituted with other amino acids in the mouse sequence were identified. For instance aR123F denotes arginine at position 123 of the alpha chain in human fibrinogen is substituted by phenylalanine in the mouse sequence. Areas that did not have surrounding regions of homology between species were denoted as (-).

Mass spectrometry data from Nakayama-Hamada et al.(25) was used to identify sites of citrullination after *in vitro* treatment of fibrinogen with PADI2 or PADI4. Mean citrulline specific antibody responses in DR4-IE tg or B6 mice immunized with CithFib at day 70. Antibody responses were determined by synovial proteome microarray analysis, and represent the mean arbitrary antibody units for 5 individual mice.
